# Supplementary material
Source: PubMed Central journal article supplement (PMC3632464)
Supplement: 00e066f3196c046d96a8bd23e96670c0_genetics.112.148205-9.pdf [file 00e066f3196c046d96a8bd23e96670c0_genetics.112.148205-9.pdf]

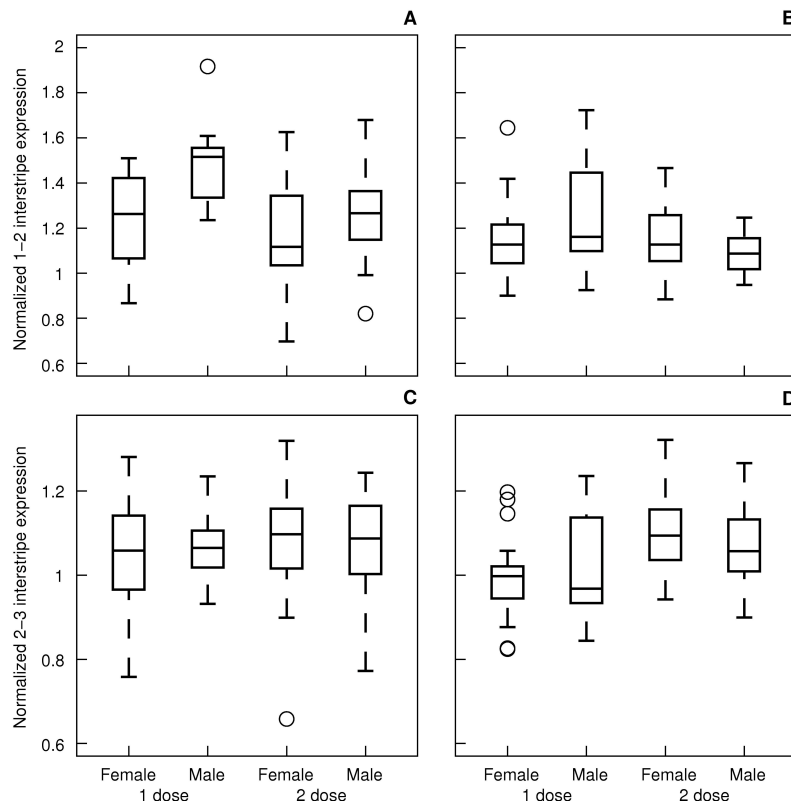

**Figure S5** Interstripe 1-2 expression is elevated in WT, but not MSE males. Plots show normalized Eve expression driven by the WT or MSE transgenes in the 1-2 (**A,B**) and 2-3 (**C,D**) interstripes. See legend of Fig. 1 for an explanation of boxplot. **A,C**, WT. **B,D**, MSE. Note that *greater* expression in an interstripe implies less repression, that is, *lower* values of relative repression. Sample size is the same as Fig. 2.
