# Supplementary material
Source: PubMed Central journal article supplement (PMC3632464)
Supplement: 3e7ff3e92027bd15cb89f119639f20f2_genetics.112.148205-10.pdf [file 3e7ff3e92027bd15cb89f119639f20f2_genetics.112.148205-10.pdf]

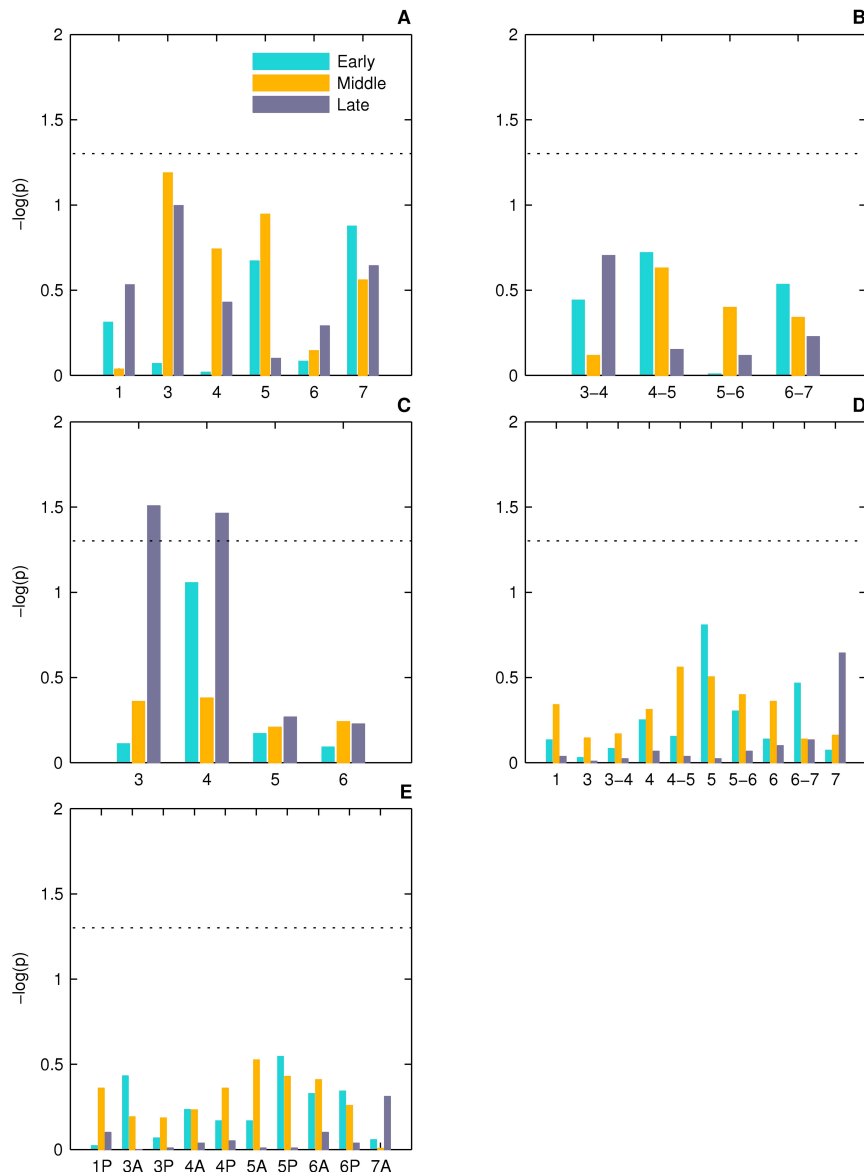

**Figure S1** Statistical tests for sex-bias in the expression features of stripes 1, 3-7 in  $w^{1118}$ .  $p$ -values of Wilcoxon ranksum test between males and females for features of stripes 1, 3-7 are plotted as negative logarithms to base 10. Dotted line is at  $p=0.05$ . **A**, Peak expression; labeled with stripe number. **B**, interstripe expression; n-m is the interstripe between stripes n and m. **C**, relative repression; calculated as the ratio of the heights of anterior and posterior borders as in Fig. 1. **D**, positions of extrema; labeled with stripe number for peaks and the interstripe number for troughs. **E**, positions of borders; labeled with stripe number and either "A" or "P" for anterior or posterior borders respectively. Peak expression is the fluorescence at the peak of a stripe.

Interstripe expression is the fluorescence at the trough between two stripes. Peak and interstripe expression were normalized to mean fluorescence in each embryo. Only relative repression of stripe 3 and 4 (panel C) show sex bias. Sample size is the same as Fig. 1E.
