# Supplementary material
Source: PubMed Central journal article supplement (PMC3632464)
Supplement: 7ff6e16a8b11f75504fcb18ecf3c364d_genetics.112.148205-8.pdf [file 7ff6e16a8b11f75504fcb18ecf3c364d_genetics.112.148205-8.pdf]

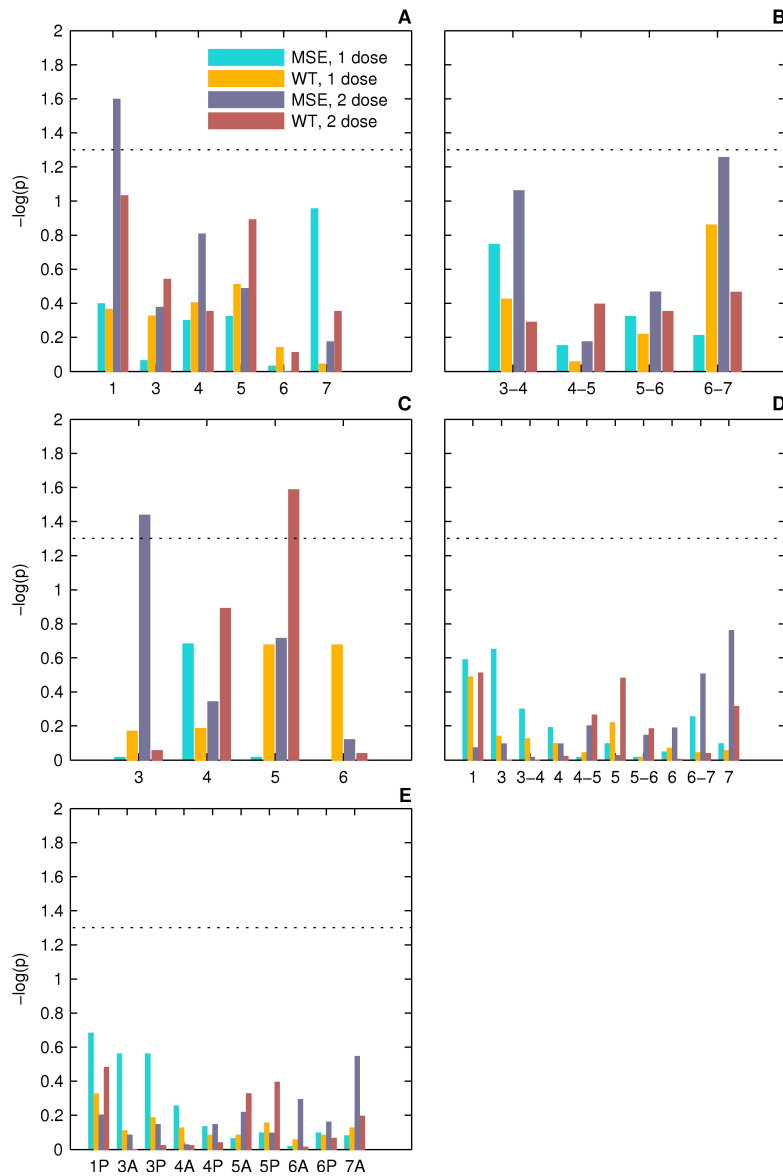

**Figure S6** Statistical tests for sex-bias in the expression features of stripes 1, 3-7 when Eve expression is driven by WT or MSE.  $p$ -values of Wilcoxon ranksum test between males and females for features of stripes 1, 3-7 plotted as negative logarithms to base 10. Dotted line is at  $p=0.05$ . **A**, Peak expression, **B**, interstripe expression, **C**, relative repression, **D**, positions of extrema, and **E**, positions of borders. See Fig. S1 for an explanation of these phenotypes. Sample size is the same as Fig. 2.
