# Supplementary material
Source: PubMed Central journal article supplement (PMC3632464)
Supplement: 28bf88049af17a8a8f4afc69a4c9769b_genetics.112.148205-4.pdf [file 28bf88049af17a8a8f4afc69a4c9769b_genetics.112.148205-4.pdf]

**Table S1 Mutant genotypes**

| Name                       | Description                                                                                                                                                                                                     |
|----------------------------|-----------------------------------------------------------------------------------------------------------------------------------------------------------------------------------------------------------------|
| <i>w</i> <sup>1118</sup>   | <i>white</i> <sup>-</sup>                                                                                                                                                                                       |
| WT                         | attP2[S2E <sup>wt</sup> EVE <sup>YFP</sup> ] 16.4kb <i>eve</i> locus with wild type stripe 2 enhancer (S2E) and a YFP tag at the C-terminus of the <i>eve</i> coding region, integrated on the third chromosome |
| MSE                        | attP2[S2E <sup>MSE</sup> EVE <sup>YFP</sup> ] 16.4kb <i>eve</i> locus with 244bp deleted from S2E (Fig. 2A) and a YFP tag at the C-terminus of the <i>eve</i> coding region, integrated on the third chromosome |
| <i>eve</i> <sup>R13</sup>  | Null allele carrying a coding point mutation                                                                                                                                                                    |
| <i>gt</i> <sup>X11</sup>   | Null allele                                                                                                                                                                                                     |
| <i>gt</i> <sup>YFP</sup>   | attP2[GT <sup>YFP</sup> ] 26.2kb region of the <i>gt</i> locus with a YFP tag at the C-terminus of the <i>gt</i> coding region, integrated on the third chromosome                                              |
| <i>eve</i> <sup>ΔMSE</sup> | Native locus in which the MSE region of the stripe 2 enhancer is deleted and replaced with <i>w</i> <sup>+</sup> sequence (Ludwig <i>et al.</i> , 2005)                                                         |
