# Supplementary material
Source: PubMed Central journal article supplement (PMC3632464)
Supplement: 415b61a76fff224f995190f6415f05fd_genetics.112.148205-6.pdf [file 415b61a76fff224f995190f6415f05fd_genetics.112.148205-6.pdf]

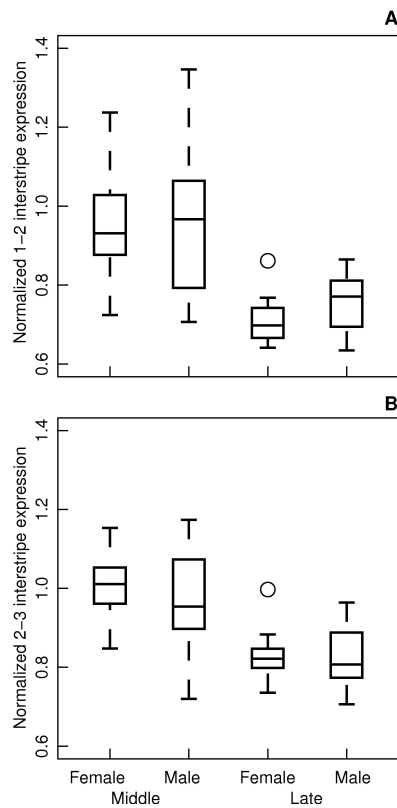

**Figure S3** Interstripe 1-2 expression is elevated in  $w^{1118}$  males. Boxplots show normalized Eve expression in the 1-2 (A) and 2-3 (B) interstripes. See legend of Fig. 1 for an explanation of boxplot. Note that *greater* expression in an interstripe implies less repression, that is, *lower* values of relative repression. Sample size is the same as Fig. 1E.
