# Supplementary material
Source: PubMed Central journal article supplement (PMC3632464)
Supplement: 9954f41f7ea5c393a3636bf485bef8e2_genetics.112.148205-3.pdf [file 9954f41f7ea5c393a3636bf485bef8e2_genetics.112.148205-3.pdf]

**Table S2 Rescue of  $gt^{X11}$  by the  $gt^{YFP}$  transgene**

| Genotype <sup>†</sup>                 | Sex    | <i>gt</i> copies           | Number of enclosed adults |
|---------------------------------------|--------|----------------------------|---------------------------|
| $gt^{X11}/+;gt^{YFP}/+$               | FEMALE | 1 endogenous + 1 transgene | 623                       |
| $FM7c/+;gt^{YFP}/+$                   | FEMALE | 2 endogenous + 1 transgene | 535                       |
| $FM7c/Y;gt^{YFP}/+$                   | MALE   | 1 endogenous + 1 transgene | 352                       |
| $gt^{X11}/Y;gt^{YFP}/+$ <sup>††</sup> | MALE   | 0 endogenous + 1 transgene | 261                       |

<sup>†</sup> Offspring of a cross between 8  $gt^{X11}/FM7c$  females and 8  $gt^{YFP}$  males at 25°, scored as described previously (Ludwig et al., 2011).

<sup>††</sup> The rescue potency of  $gt^{YFP}$  is estimated to be ~40% as the ratio between the number of adults of the  $gt^{X11}/Y;gt^{YFP}/+$  and  $gt^{X11}/+;gt^{YFP}/+$  genotypes. The rescued males were healthy and fertile.
