# Supplementary material
Source: PubMed Central journal article supplement (PMC3632464)
Supplement: b66a3597ed8a9b0299880a225bcb7170_genetics.112.148205-2.pdf [file b66a3597ed8a9b0299880a225bcb7170_genetics.112.148205-2.pdf]

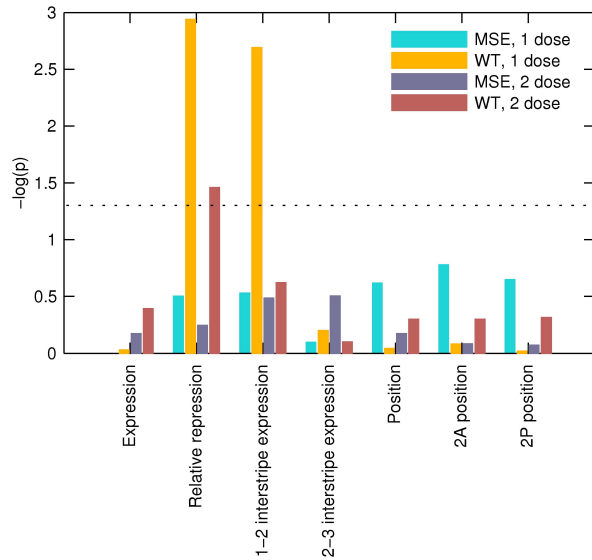

**Figure S4** Relative repression is the only sex-biased stripe 2 feature in WT, while MSE lacks sex bias in all stripe 2 features. The negative logarithm to base 10 of  $p$ -values of the Wilcoxon ranksum test between males and females. Dotted line is at  $p=0.05$ . Expression is the fluorescence at stripe peak. Relative repression is defined in Fig. 1. Interstripe expression is the fluorescence at the troughs between stripes 1 and 2 (1-2) and 2 and 3 (2-3). Peak and interstripe expression were normalized to mean fluorescence in each embryo. Position is the position of stripe 2 peak. 2A and 2P positions are the positions of the anterior and posterior borders respectively. Sample size is the same as Fig. 2.
