# Supplementary material
Source: PubMed Central journal article supplement (PMC3632464)
Supplement: b0122cda89212cbcb013f6b07e39a3e3_genetics.112.148205-7.pdf [file b0122cda89212cbcb013f6b07e39a3e3_genetics.112.148205-7.pdf]

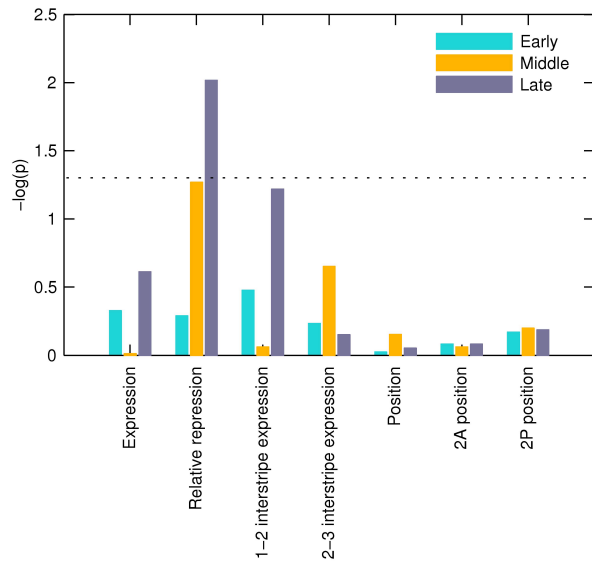

**Figure S2** Relative repression is the only sex-biased stripe 2 feature in  $w^{1118}$ . The negative logarithm to base 10 of  $p$ -values of the Wilcoxon ranksum test between males and females. Dotted line is at  $p=0.05$ . Expression is the fluorescence at stripe peak. Relative repression is defined in Fig. 1. Interstripe expression is the fluorescence at the troughs between stripes 1 and 2 (1-2) and 2 and 3 (2-3). Peak and interstripe expression were normalized to mean fluorescence in each embryo. Position is the position of stripe 2 peak. 2A and 2P positions are the positions of the anterior and posterior borders respectively. Sample size is the same as Fig. 1E.
