# Supplementary material
Source: PubMed Central journal article supplement (PMC3632464)
Supplement: e9e9ebf5f941878f78de07d89c6b1e2b_genetics.112.148205-5.pdf [file e9e9ebf5f941878f78de07d89c6b1e2b_genetics.112.148205-5.pdf]

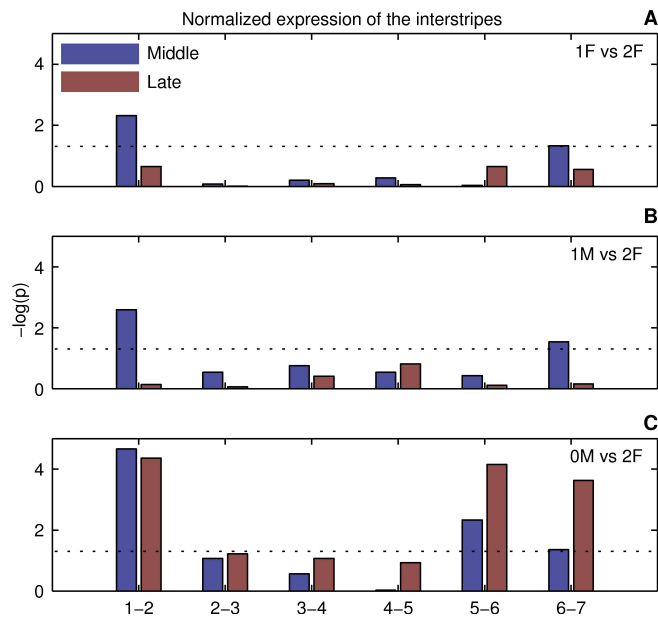

**Figure S7** *gt* dose affects expression at the 5-6 and 6-7 interstripes. *p*-values of the Wilcoxon ranksum test on normalized interstripe expression between 1F (A), 1M (B), or 0M (C) and 2F genotypes are plotted as negative logarithms. Dotted line corresponds to  $p=0.05$ . Both 1M and 1F have the same pattern of differential expression, differing from 2F in the 1-2 and 6-7 interstripes but not elsewhere. 0M (*gt*) also differs from 2F in the same pattern except that 5-6 interstripe expression is also affected. Sample size is the same as Fig. 3B.
