# Supplementary material
Source: PubMed Central journal article supplement (PMC3632464)
Supplement: f67b40fa40a52564b247e98d2ddd04a8_genetics.112.148205-11.pdf [file f67b40fa40a52564b247e98d2ddd04a8_genetics.112.148205-11.pdf]

**File S1**

**Supplementary Materials and Methods**

**Sequence of SYFP2 (Drosophila codon usage adjusted)**

ATGGTGAGCAAGGGCGAGGAGCTGTTACCGGCGTGGTGCCCATCTGGTCGAGCTGGACGGCGACGTGAACGGCCACAAGTTCAGCGTGC  
GCGGCGAGGGCGAGGGCGACGCCACCAACGGCAAGCTGACCCTGAAGCTGATCTGCACCACCGCAAGCTGCCGTGCCCTGGCCACCCT  
CGTGACCACCCTGGGCTACGGCGTGCAGTGCTTCGCCCCGTACCCCGACCACATGAAGCAGCAGACTTCTTCAAGTCCGCCATGCCCGAGGG  
CTACGTCCAGGAGCGCACCATCTTCTCAAGGACGACGGCACCTACAAGACCCGCGCCGAGGTGAAGTTCGAGGGCGACACCCTGGTGAACC  
GCATCGAGCTGAAGGGCATCGACTTCAAGGAGGACGGCAACATCCTGGGCCACAAGCTGGAGTACAACCTCAACAGCCACAACGTCTACATC  
ACCGCCGACAAGCAGAAGAACGGCATCAAGGCCAACTTCAAGATCCGCCACAACGTGGAGGACGGCGGCGTGCAGCTCGCCGACCACTACC  
AGCAGAACACCCCATCGGCGACGGCCCCGTGCTGCTGCCGACAACCACTACCTGAGCTACCAGTCCAAGCTGAGCAAGGACCCCAACGAG  
AAGCGCGACCACATGGTCTGCTGGAGTTCGTGACCGCCCGCCGCATCACCCACGGCATGGACGAGCTGTACAAGTAA

**Sequence of genomic *giant* 26149bp**

*Drosophila melanogaster* Reference Sequence Release 5.30

Start X: 2312831

End X: 2338979

**Primers for recombineering**

***gt* –YFP fusion**

Primer\_gtCYFP\_F:

CCCTCAAGGTCCAGCTGGCCGCTTACCTCCGCCAAAGTAACCACCGCCGATTATGATATTCCAACACTACTGCAAGCATGGTGAGCAAGGGCG  
AG

Primer\_gtCYFP\_R:

ACATACGATTCGGATCCTCGCGTTCAACGCATCAAGAGAGGAGTGGACCTTACTTGTACAGCTCGTCCATGC

**For cloning from BAC to attB\_3xP3\_DsRed\_P15A-amp**

gt\_intF2:

TATCTCAATAATACACATCTAGTTTCGGATCCTTAAGTCTACTTGAAACTCAGGCATTCAAATATGTATCC

gt\_intR2:

CGTCATAAATGGCAGTGTCTTAAATTACAATCCTTCCCTTGGTCTTCTCGTCGACGATGTAGGTCACG

**For verification of the insertion of the vector attB into attP2 landing site**

See Ludwig *et al.* (2011).

**Primers for genotyping**

***p[hb-lacZ]* marker (800bp) for balancer second chromosome**

Z353 CTGCCAGTTTGAGGGGACGACGACA

hb32 ACCAACGTAATCCCATAGAAAA

**Positive marker (80bp) of PCR genotyping reaction**

sna-F CCCACGTGGACGTCAAGAA

sna-R GAGCGACATCCTGGAGAAAGA

**Male fertility factor *k15* gene on the Y chromosome (240bp)**

y6527 GGCCTAATTGGAGACCTGTTTC

y6749 CTGGTTTTGGTATGTCTTGTTA

***p[GAL4-Kr.C] > p[UAS-GFP.S65T] on the X chromosome (600bp)***

Pry1 CCTTAGCATGTCCGTGGGGTTTGAAT

5542GFP TTGCATCACCTTCACCCTCTCCCCT
